# Supplementary material
Source: Springer Nature journal article supplement (https://www.springermedizin.de/resource/supplementary/12992_2011_126_MOESM1_ESM.pdf/9616510)
Supplement: MOESM1 [file 9616510]

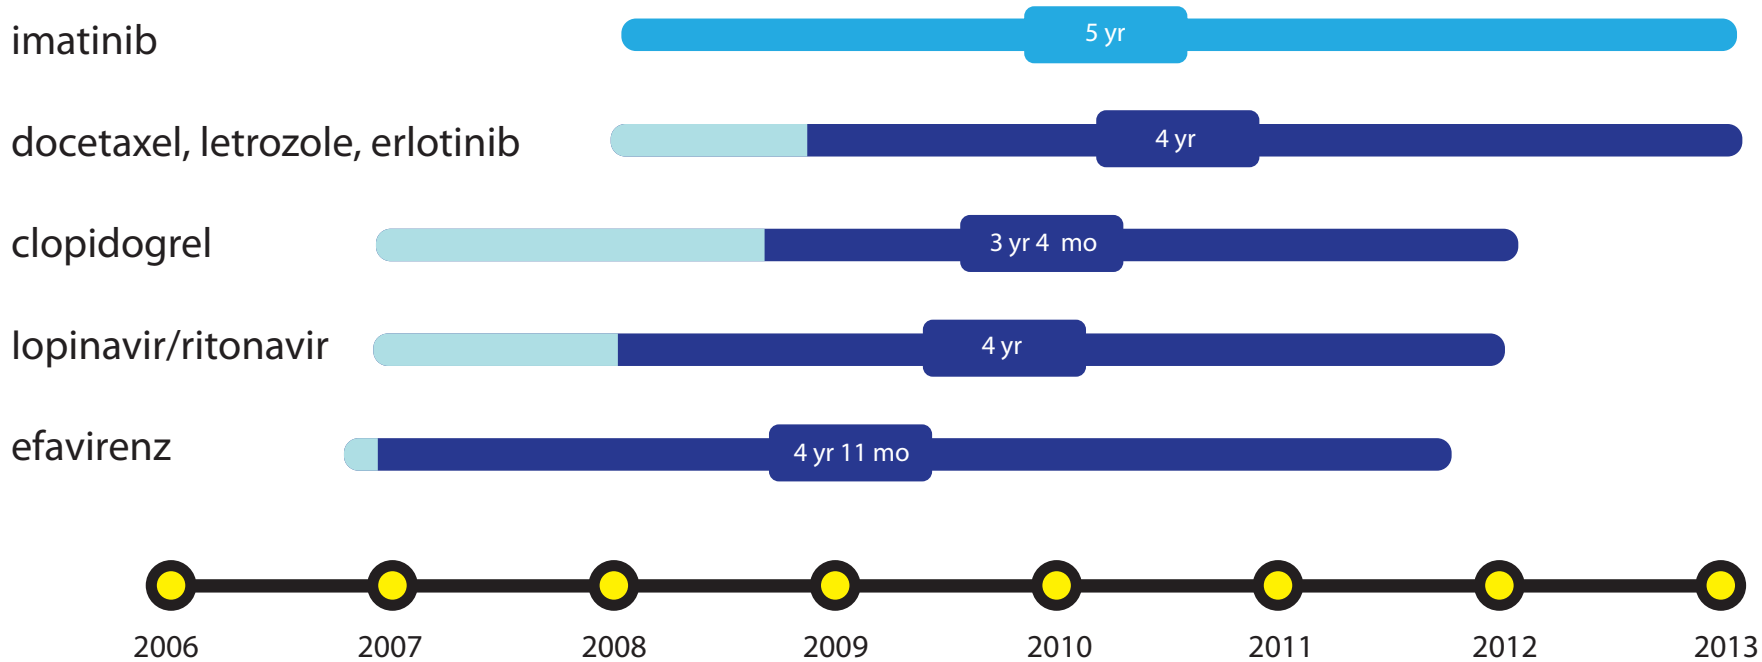

 Timeline: from date of government use licenses to date of import of generic drug

 Timeline: from date of import of generic drug to the end of study time frame

 Timeline: study time frame for imatinib - suspended government use licence

Yr: Year Mo: Month
